# Supplementary material for: Laser-induced graphene on the surface of carbon-coated 3D-printed microneedle arrays for minimally invasive electrochemical detection of olanzapine
Source: Royal Society of Chemistry journal article supplement (doi:10.1039/d5tb02162f), 2026-01-01
Supplement: d5tb02162f1.pdf [file d5tb02162f1.pdf]

## **Supporting information**

### **Laser Induced Graphene on the Surface of Carbon-Coated 3D-Printed Microneedle Array for Minimally Invasive Electrochemical Detection of Olanzapine**

Sachin Kadian<sup>1</sup>, Siba Sundar Sahoo<sup>2</sup>, Fahad Munshe<sup>2</sup>, Shubhangi Shukla<sup>1</sup> and Roger J.  
Narayan<sup>1,2</sup>

<sup>1</sup>Joint Department of Biomedical Engineering, University of North Carolina and North Carolina  
State University, Raleigh, NC 27695, USA

<sup>2</sup>Department of Materials Science and Engineering, North Carolina State University, Raleigh,  
NC 27695, USA

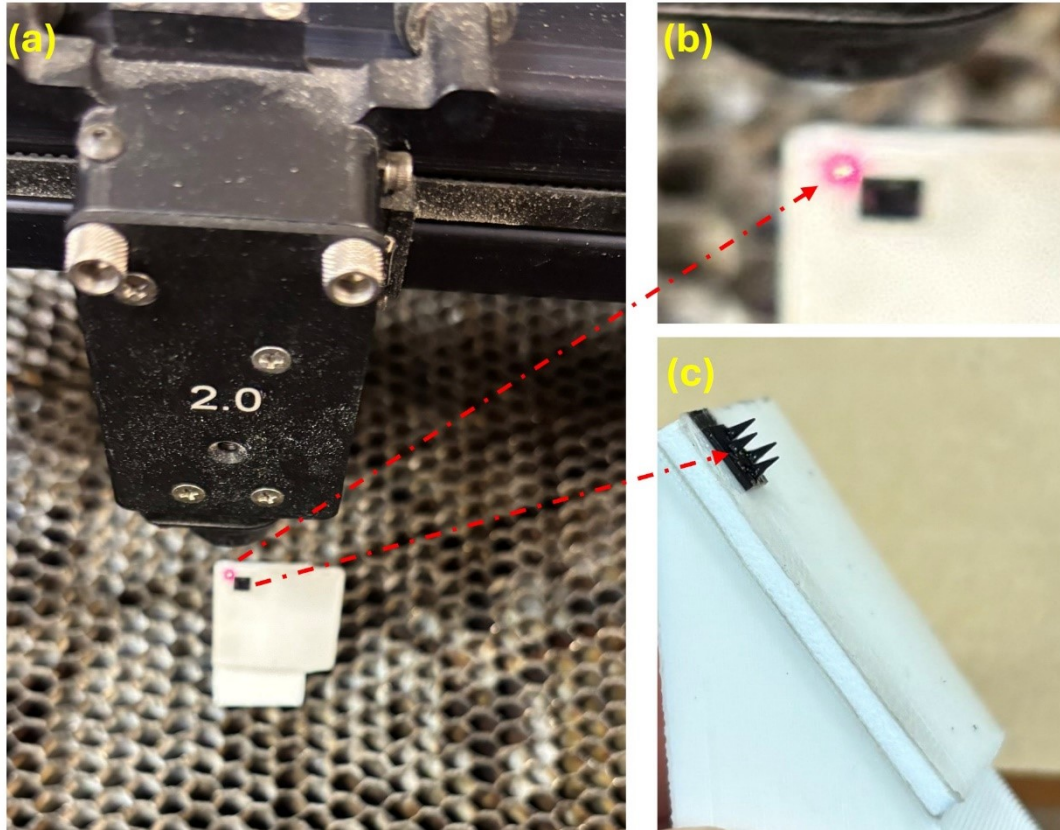

**Fig S1:** Illustration of laser induced graphitization of carbon-coated 3D-printed microneedle array. (a) Photo of custom 3D-printed block angled at 60° holding the carbon-coated 3D-printed microneedle array positioned under the CO<sub>2</sub> laser beam (b) magnified photo of the laser beam focused on the 3D-printed block before laser irradiation and (c) carbon-coated 3D-printed microneedle array (2 x 2) affixed onto a custom 3D-printed block angled at 60°, using double-sided adhesive tape to ensure stable positioning and exposure.

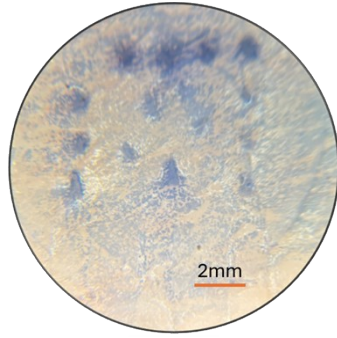

**Fig S2:** Microscopic image of skin patch after microneedle insertion and Trypan Blue treatment.

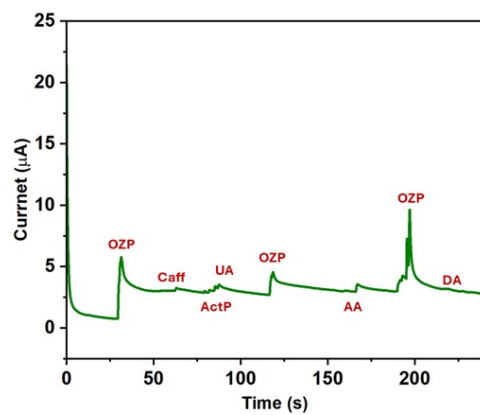

**Fig S3:** Chronoamperometry response of microneedles sensor towards OPZ in the presence of potential interference compounds.

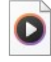

Video1.mp4

**Supplementary Video 1:** Short video clip of the laser induced graphitization of carbon-coated 3D-printed microneedle array using CO<sub>2</sub> laser machine.
